# Supplementary material for: Two-Dimensional Core-Shell Structure of Cobalt-Doped@MnO2 Nanosheets Grown on Nickel Foam as a Binder-Free Battery-Type Electrode for Supercapacitor Application
Source: MDPI journal article supplement (doi:10.3390/nano12183187), 2022-09-14
Supplement: s1 [file s1]

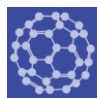

# Two-Dimensional Core-Shell Structure of Cobalt-Doped@MnO<sub>2</sub> Nanosheets Grown on Nickel Foam as a Binder-Free Battery-Type Electrode for Supercapacitor Application

Md Moniruzzaman <sup>1</sup>, Yedluri Anil Kumar <sup>2,3</sup>, Mohan Reddy Pallavolu <sup>4</sup>, Hammad Mueen Arbi <sup>2,3</sup>, Salem Alzahmi <sup>3,5,\*</sup>, Ihab M. Obaidat <sup>2,3,\*</sup>

<sup>1</sup> Department of Chemical and Biological Engineering, Gachon University, Gyeonggi-do 13120, Korea; mani57chem@gachon.ac.kr

<sup>2</sup> Department of Physics, United Arab Emirates University, Al Ain 15551, United Arab Emirates; yedluri.anil@gmail.com (Y.A.K.); 201990023@uaeu.ac.ae (H.M.A.)

<sup>3</sup> National Water and Energy Center, United Arab Emirates University, Al Ain 15551, United Arab Emirates

<sup>4</sup> School of Chemical Engineering, Yeungnam University, Gyeongsan 38541, Korea; pallavolumohanredy@gmail.com

<sup>5</sup> Department of Chemical & Petroleum Engineering, United Arab Emirates University, Al Ain 15551, United Arab Emirates

\* Correspondence: s.alzahmi@uaeu.ac.ae (S.A.); iobaidat@uaeu.ac.ae (I.M.O.)

## 1. Materials and reagents

All the chemicals of analytical grade were used as received without further purification. Manganese chloride hexahydrate (MnCl<sub>2</sub>·4H<sub>2</sub>O, 99.1%, Sigma Aldrich, St. Louis, MO, USA), Cobalt nitrate hexahydrates (Co(NO<sub>3</sub>)<sub>2</sub>·6H<sub>2</sub>O, 99.2%, Sigma Aldrich), and urea (CH<sub>4</sub>N<sub>2</sub>O, 99.1%, Sigma Aldrich) were purchased from Sigma Aldrich, Korea. Ni foam has received from Japan. potassium hydroxide (KOH, 99.99%), Hydrochloric acid (HCl, 99.2%), and sodium hydroxide (NaOH, 99.8%) were purchased from Samchun Chemicals, Korea. Ni foam with a 1.6 mm thickness was purchased from Alantum, Korea. De-ionized (DI, 100%) water and double-distilled water (DDW, 100%) were used especially for the purposes of preparing solutions and washing.

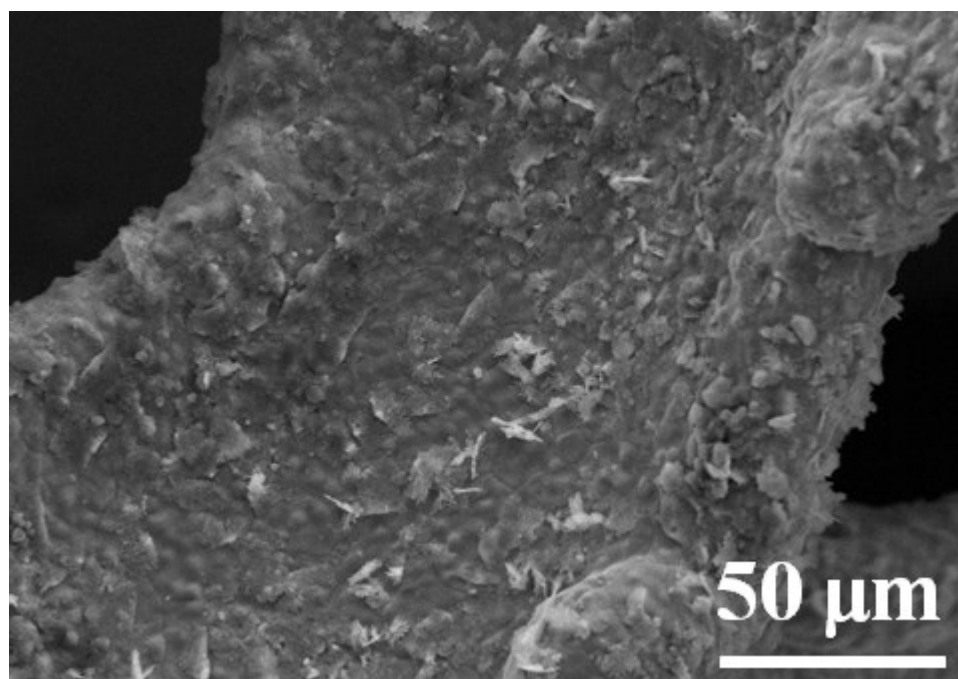

Figure S1. SEM image of cobalt-doped@MnO<sub>2</sub> nanosheets well distributed on nickel foam.

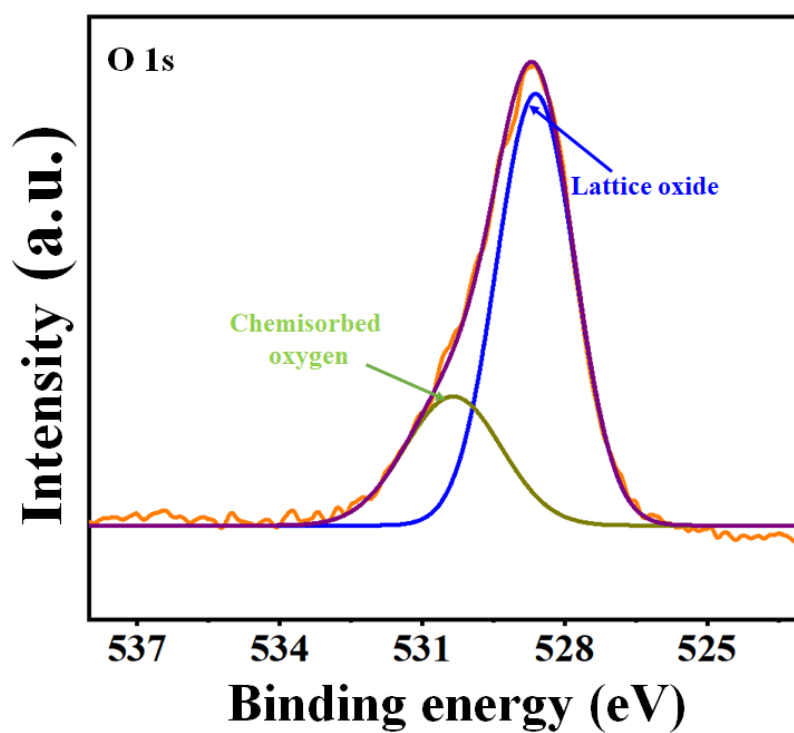

Figure S2. O 1s XPS spectrum of cobalt-doped@MnO<sub>2</sub> nanosheets composite.

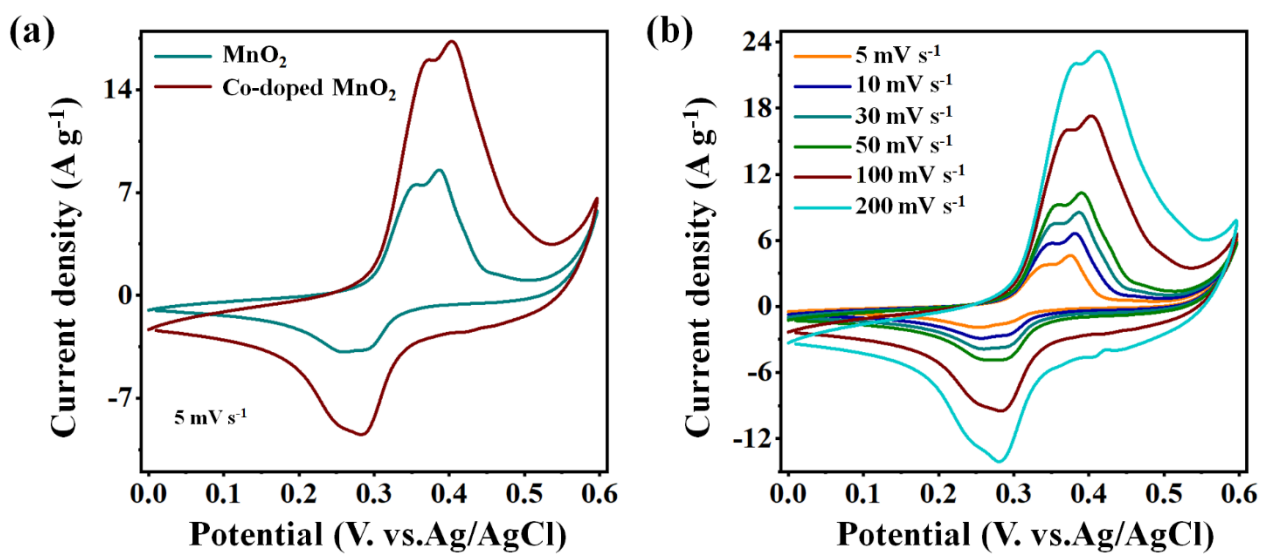

**Figure S3.** (a) CV comparison of  $\text{MnO}_2$  and cobalt-doped  $\text{MnO}_2$  nanosheets composite electrode materials and (b) CV curves of  $\text{MnO}_2$  sample.
